# Supplementary figures and images for: Tricuspid Structural Valve Deterioration Treated with a Transcatheter Valve-in-Valve Implantation: A Single-Center Prospective Registry
Source: MDPI journal article supplement (doi:10.3390/jcm11092667), 2022-05-09

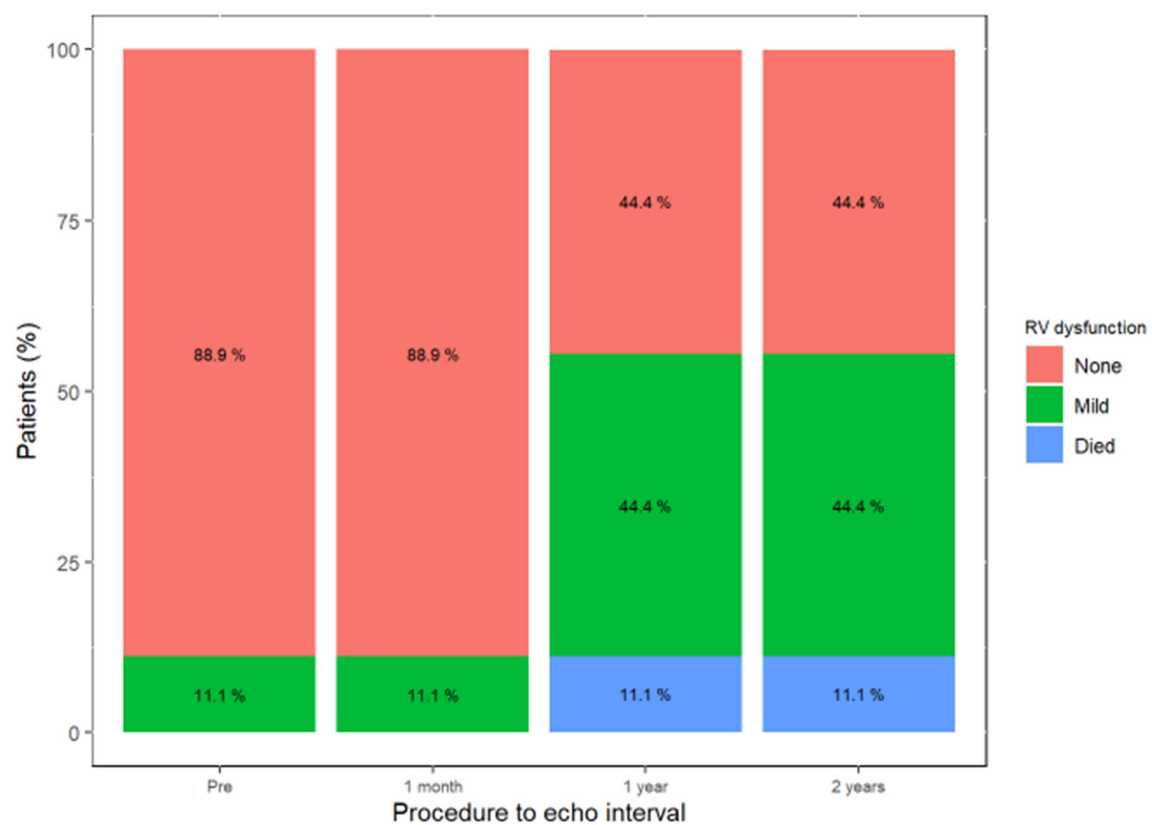

**Supplementary Figure S1.** Right ventricular function during follow up.

Supplement: s1 [file s1]
